1 **Original article**

2

3 **Title**

4 Drastic shift in flowering phenology, an instant reproductive isolation mechanism, explains the  
5 population structure of *Imperata cylindrica* in Japan

6

7 **Running title**

8 Drastic phenology shift of F<sub>1</sub> hybrids

9

10 **Authors/Affiliations**

11 Yasuyuki Nomura<sup>1,2</sup>, Yoshiko Shimono<sup>2</sup>, Nobuyuki Mizuno<sup>2</sup>, Ikuya Miyoshi<sup>2</sup>, Satoshi Iwakami<sup>2</sup>,

12 Kazuhiro Sato<sup>3</sup>, Tohru Tominaga<sup>2</sup>

13 <sup>1</sup> Present address: Research Institute for Food and Agriculture, Ryukoku University, 1-5 Yokoya,

14 Seta Oe-cho, Otsu, Shiga 520-2194, Japan

15 <sup>2</sup> Graduate School of Agriculture, Kyoto University, Kitashirakawa Oiwake-cho, Sakyo, Kyoto

16 606-8502, Japan

17 <sup>3</sup> Institute of Plant Science and Resources, Okayama University, 2-20-1 Chuo, Kurashiki,

18 Okayama 710-0046, Japan

19

20 Correspondence: [carniplant8931@yahoo.co.jp](mailto:carniplant8931@yahoo.co.jp)

21

## 22 **Author contributions**

23 Y.N., Y.S., S.I. and T.T. designed experiments. T.T. provided plant materials that he has  
24 maintained since the 1980s. Y.N., Y.S. and I.M. further collected plant materials. Y.N. performed  
25 most of the experiments. Y.N., N.M. and K.S. and. performed RNA-Seq analysis. Y.N., Y.S.,  
26 N.M., S.I. K.S. and T.T. wrote the paper.

27

## 28 **Acknowledgement**

29 Partly supported by the Japan Society for the Promotion of Science (21380015) and ESPEC  
30 Foundation for Global Environment Research and Technology to T.T.

31

## 32 **Data accessibility statement**

33 The RNA-Seq and Sanger sequence data reported in this paper have been deposited in the DNA  
34 Data Bank of Japan (DDBJ; accession numbers XXXXXX [RNA-Seq], XXXXXX [Sanger  
35 sequences]).

36

37

38 **Declaration of Interests**

39 The authors declare no competing interests.

40

41 **Title**

42 Drastic shift in flowering phenology, an instant reproductive isolation mechanism, explains the  
43 population structure of *Imperata cylindrica* in Japan

44

45 **Abstract**

46 Reproductive isolation plays an important role in population differentiation and speciation, thus  
47 enhancing biodiversity in wild plants. Hybridisation sometimes involves rapid reproductive  
48 isolation between parents and their hybrids through the novel traits of hybrids derived from a  
49 new combination of genomes. Here, we report how a hybrids' new phenotype contributes to  
50 rapid reproductive isolation between two ecotypes of *Imperata cylindrica*. The two ecotypes  
51 differ in their flowering phenology and habitats. An analysis with genetic markers revealed that  
52 hybrid populations consisted of only F<sub>1</sub> individuals. Both parental ecotypes flowered in spring,  
53 but F<sub>1</sub>s flowered in fall. This drastic shift in flowering phenology prevented backcrossing  
54 parental ecotypes to F<sub>1</sub>. F<sub>1</sub>s flowered in fall and dispersed seeds in winter. The germination  
55 percentage of seeds set on F<sub>1</sub> was extremely low in their habitats, and seedlings did not survive  
56 due to the low temperatures in winter, resulting in the absence of a F<sub>2</sub> generation. In conclusion,  
57 flowering phenology mismatch promotes reproductive isolation between parents and F<sub>1</sub>,  
58 resulting in a hybrid population consisting of only F<sub>1</sub>s.

59

60 **Keywords:** hybridisation, flowering phenology shift, ecotype, instant reproductive isolation,

61 *Imperata cylindrica*, population genetic structure

62

## 63 **Introduction**

64           Around 50% of flowering plants are estimated to have experienced polyploid  
65 speciation. Nearly all such polyploid individuals are considered to be derived from  
66 hybridization (Soltis and Soltis 2009; Wood et al. 2009; Soltis et al. 2015). Hybridisation is a  
67 major source of phenotypic variation (Grant and Grant 1994) and a driving force of evolution  
68 (Coyne and Orr 2004). One of the evolutionary consequences of hybridisation is hybrid  
69 speciation, which cause species diversification (Mallet 2007; Soltis and Soltis 2009; Wood et al.  
70 2009). The resultant hybrids are sometimes prevented from crossing with their parental lineages  
71 due to an altered trait related to reproduction, resulting in the change of population structure  
72 and ultimately species diversification (Buerkle et al. 2000; Duenez-Guzman et al. 2009; Kagawa  
73 and Takimoto 2018).

74           Previous studies have demonstrated that novel traits derived from hybridization  
75 directly contribute to reproductive isolation. Mating between individuals that have evolved  
76 independently results in a novel combination of genomes or gene sets; this process can  
77 generate a wide range of phenotypes, including some of which that exceed or interpose  
78 variations among the parental lineages by overdominance or transgressive phenotype  
79 (Johansen-Morris and Latta 2006). For example, floral color in *Iris* species (Taylor et al. 2013)  
80 and floral odor for *Narcissus* species (Marques et al. 2016) differ among hybrids from those

81 of their parents, resulting in recruitment of novel pollinators for hybrids and reproductive  
82 isolation between hybrids and parents. Similarly, new hybrid phenotypes related to beak  
83 morphology and mating songs in Darwin's finch (Lamichhaney et al. 2018), wing color patterns  
84 in *Heliconius* butterfly (Mavárez et al. 2006), and behavioral mate choice in cichlids (Selz et  
85 al. 2014) have caused reproductive isolations from parents. Thus, novel hybrid traits can  
86 generate genetic and evolutionary changes.

87 In this study, we report a novel trait in hybrids of two *Imperata cylindrica* (L.)  
88 Raeusch (cogongrass) ecotypes. *Imperata cylindrica* is a perennial rhizomatous grass with a  
89 self-incompatible and wind-pollinated reproduction system; it is native to tropical and  
90 subtropical areas of the Northern and Southern Hemispheres, including Japan (Holm et al. 1977).  
91 Japanese cogongrass populations consist of two ecotypes: common type (C-type) and early  
92 flowering type (E-type) (Matumura and Yukimura 1980; Tominaga et al. 1989; Mizuguti et al.  
93 2003). These ecotypes are typically distinguished by their morphology; the E-type has a  
94 glabrous culm, whereas the C-type has a hairy culm (Figure 1). They also differ in terms of  
95 habitat and flowering phenology: the C-type mainly lives in dry habitats (e.g. roadside, levee of  
96 paddy fields), whereas the E-type often lives in wet habitats (e.g. marshy area, moist fallow  
97 fields). In addition, the E-type flowers approximately 1 month earlier than the C-type. These  
98 differences in habitat and flowering phenology isolate the two ecotypes, although the existence

99 of hybrids between the two ecotypes was initially recognized through allozyme analysis using a  
100 single marker (Mizuguti et al. 2004; Tominaga et al. 2007). Since then, the distribution and  
101 genetic population structure of the hybrids remained unknown.

102 In this study, we analysed 183 populations of cogongrass collected from the 1980s to  
103 the 2010s throughout Japan using newly established molecular markers. We performed field  
104 surveys and common garden experiments to determine the outcomes of backcrossing and  
105 crossing among the F1 generation to evaluate the contribution of hybrid flowering phenology to  
106 their genetic population structure. Our findings will provide insight into the reproductive  
107 isolation resulting from hybridisation.

108

## 109 **Materials and methods**

### 110 *Accession and study site*

111 Three hundred fifty accessions of cogongrass were collected from throughout Japan, from 1980s  
112 to 2010s, and maintained at an experimental farm of Kyoto University, Kyoto, Japan  
113 (35°01'54.5"N, 135°46'59.5"E) (Figure 2; Table S1). The chloroplast DNA (cpDNA) haplotypes  
114 of 33 out of the 350 accessions were previously determined by Nomura et al. (2015). Field  
115 survey and material collection were conducted in north sites (Aomori, Akita, Iwate, Yamagata,  
116 Miyagi, Fukushima and Tochigi Prefecture; 36°54'41"N – 40°32'07"N, 139°48'34"E –



117 141°40'10"E) and south sites (Wakayama Prefecture; 33°29'01"N–33°39'39"N, 135°46'39"–  
118 135°57'59") regions, Japan in 2016–2018 (Figure S1).

119

#### 120 *Evaluation of morphological traits*

121 Morphological traits were evaluated for a total of 46 accessions: 17 accessions of the C-type, 15  
122 accessions of the E-type, and 14 accessions of putative hybrids (Table S1). The existence of  
123 hairs on culm nodes (1, absence; 2, partial presence; 3, presence), hairs on leaf sheathes (1,  
124 absence; 2, partial presence; 3, presence), wax on leaf sheathes (1, absence; 2, presence), the  
125 ratio of aerenchyma diameter to midrib diameter, and the ratio of aerenchyma diameter in a pith  
126 to rhizome diameter were recorded (Figure 1).

127

#### 128 *Nucleic acid extraction*

129 DNA was extracted from leaves of cogongrass using the modified cetyltrimethylammonium  
130 bromide method (Murray and Thompson 1980). Total RNA was extracted from leaves using a  
131 RNeasy Plant Mini kit (Qiagen, Tokyo, Japan) according to the manufacturer's instructions.

132

#### 133 *Development of nuclear markers*

134 Total RNA extracted from 22 accessions of the E-type throughout Japan (Table S1) was bulked,  
135 and a total of 4 µg of total RNA was used to construct paired-end libraries using the TruSeq  
136 RNA Sample Preparation Kit v3 (Illumina, Inc., San Diego, CA, USA) according to the  
137 manufacturer's instructions. The libraries were sequenced on MiSeq (Illumina) with 300-bp  
138 paired-end reads. Filtering of low-quality bases (Phred score < 20) and adapter sequences, *de*  
139 *novo* transcriptome assembly, and detection of polymorphisms were conducted using CLC  
140 Genomics Workbench software version 8.0 (CLC bio Japan, Inc., Tokyo, Japan).

141 One hundred seven primer sets were designed to amplify DNA of 300–900 bp in  
142 which polymorphisms were detected in the above RNA-Seq analysis. PCR was conducted using  
143 DNA from two C-type and six E-type accessions selected at random. PCR amplification was  
144 performed in a 20-µL volume containing 2.5–25 ng of extracted DNA, 0.2 mM each dNTP, 0.5  
145 µM each forward and reverse primer, 2.0 µL of 10× ThermoPol™ Buffer, and 0.5 U of *Taq*  
146 DNA polymerase (New England Biolabs Japan Inc., Tokyo, Japan). The PCR programme  
147 consisted of an initial denaturation at 95.0°C for 3 min followed by 45 cycles at 95.0°C for 15 s,  
148 annealing 55°C for 30 s, and extension at 68.0°C for 1 min; with a final extension at 68.0°C for  
149 3 min. The PCR products were subjected to agarose gel electrophoresis. The PCR products that  
150 contained a single band of the expected size were purified using ExoSAP-IT (USB Corporation,  
151 Cleveland, OH, USA) and directly sequenced using an ABI 3130xl Genetic Analyzer (Applied

152 Biosystems, Foster City, CA, USA) with BigDye™ Terminator v. 3.1 (Applied Biosystems).  
153 Fifty seven PCR products were sequenced. Among the 57 primer sets that resulted in PCR  
154 products with a clear chromatogram in direct sequencing, 10 were selected for investigation of  
155 population structure (Table S2).

156 In addition to the 10 primer sets, 2 primer sets were designed based on the sequences  
157 of cogongrass in GenBank: *ppc-C4* (AM690231) and the ITS region (JN407507). The primers  
158 are listed in Table S2.

159

#### 160 *Development of CAPS markers to distinguish ecotypes*

161 Cleaved amplified polymorphic sequences (CAPS) markers in nuclear DNA were developed to  
162 distinguish ecotypes and their hybrids. Primers were designed for the ITS region and EST104  
163 (Table S2, ITS\_CAPS and EST104\_CAPS), and PCR was performed as described above. The  
164 PCR products of ITS and EST104 were digested with *DdeI* and *RsaI* (New England Biolabs  
165 Japan, Inc., Tokyo, Japan), respectively, and resolved on an agarose gel (Figure S2).

166 A CAPS marker on cpDNA was also developed to distinguish maternal ecotypes. The  
167 *psbA–matK* region was amplified by PCR using the primer set (Yasuda and Shibayama 2006):  
168 forward PSA-F, 5'-CAGGCTTGTACTTTTCGCGTC-3'; reverse MTK-R,  
169 5'-CAATGTCCTGGTGAATCCTC-3'. PCR was carried out as described (Nomura et al. 2015).

170 The PCR products were incubated with *DraI* (TaKaRa Bio, Inc., Shiga, Japan) and subjected to  
171 gel electrophoresis.

172

173 *Analysis of population structure*

174 SNPs with a low frequency (<10% in all accessions) were excluded from haplotype analysis  
175 using PHASE 2.1 (Stephens et al. 2001). Principal coordinate analysis (PCoA) was conducted  
176 using GENALEX 6.502 (Peakall and Smouse 2006, 2012). The population genetic structure was  
177 inferred using the Markov chain Monte Carlo (MCMC) and the Bayesian clustering algorithms  
178 implemented in STRUCTURE v. 2.3.1 (Pritchard et al. 2000) with 1,000,000 MCMC steps  
179 following 100,000 burn-in MCMC steps. The number of clusters ( $K$ ) was tested from 1 to 10  
180 with 10 replicates. The appropriate number of clusters was estimated using the Evanno  $\Delta K$   
181 parameter (Evanno et al. 2005).

182 Distinction of hybrids from parental ecotypes and identification of generation of  
183 hybrids were conducted using NEWHYBRIDS v. 1.1 (Anderson and Thompson 2002). Ten  
184 independent runs were conducted with 1,000,000 MCMC steps following 100,000 burn-in  
185 MCMC steps, and the posterior probability was computed for each of the six classes: the  
186 two-parental ecotypes,  $F_1$  and  $F_2$  generations, and backcrosses to each parental class. The 10

187 independent results of STRUCTURE and NEWHYBRIDS were amalgamated using CLUMPP v.

188 1.1.2 (Jakobsson and Rosenberg 2007).

189

190 *Genotyping of putative F<sub>2S</sub>*

191 Seven F<sub>1</sub> plants were open-pollinated in 15 m x 15 m plot of an experimental farm of Kyoto

192 when only F<sub>1</sub> plants were in bloom. The seeds collected from the plants were germinated on

193 filter paper in a Petri dish at 30/20°C day/night with a 12-h photoperiod in an incubator and

194 seedlings were transplanted into plastic pots (11.3-cm diameter × 14.0-cm height). The genotype

195 of each putative F<sub>2</sub> was evaluated using the CAPS marker in the ITS region and EST104, and

196 direct sequencing using ppc-C4 and EST72 primer sets (Table S2) described above.

197

198 *Percentage of hybridisation between the C- and E-types in natural habitats*

199 Seeds were collected during May to July in 2017 and 2018 from cogongrass individuals in north

200 sites and south sites, where C- and E-type occur next to each other (1–20 m). The seeds from

201 each seed parent were germinated at 30/20°C. The genotype of each ramet and each seedling

202 was evaluated using the CAPS marker in the ITS region described above.

203

204 *Investigation of flowering phenology*

205 Flowering periods of cogongrass were investigated in spring and fall in the natural habitats of  
206 north and south sites during 2016–2018 (Figure S2). In north sites, a total of 1,092 ramets were  
207 investigated in spring (July 2017 and May–June 2018) and 1,467 ramets in fall (November–  
208 December 2016 and October 2017) from 58 populations. In south sites, a total of 251 ramets  
209 were investigated in spring (April–June 2017) and 210 ramets in fall (November–December  
210 2016 and October 2017) from six populations. Each population consisted of 2 to 92 ramets.  
211 Ramets in the flowering and non-flowering phases were sampled at >1-m intervals. The  
212 genotype of each ramet was evaluated using the CAPS marker in the ITS region described  
213 above.

214 Flowering phenology was monitored for C-, E-type, and artificially crossed F<sub>1</sub> plants  
215 cultivated from 1 April to 30 November 2018 at the experimental farm of Kyoto University. The  
216 experimental farm was located between two hybrid zone, north and south sites. The survey was  
217 conducted for 141 accessions from 122 populations of the C-type and 83 accessions from 54  
218 populations of the E-type and artificially generated F<sub>1</sub> hybrids. The age of these plants were not  
219 controlled. The artificial F<sub>1</sub>s were generated by hand pollination between two ecotypes collected  
220 from the same prefecture, namely populations from Miyagi, Ibaraki, Ishikawa, Fukui, Shizuoka,  
221 Aichi, Osaka, and Wakayama, in 2010 (Miyoshi and Tominaga 2017) and 2017. Success of  
222 hybridisation was evaluated using the CAPS marker in the ITS region. Two hundred twenty-one

223 individuals in which hybridisation was successful were used for the observation of flowering  
224 phenology. The plants were grown in plastic pots (15.9-cm diameter × 19.0-cm height) or clay  
225 pots (21.8-cm diameter × 17.5-cm height) containing paddy soil. The date on which the top of  
226 the first panicle emerged from a leaf sheath was defined as the flowering date.

227

#### 228 *Investigation of seed sets*

229 Together with the survey of flowering phenology in natural habitats in 2016–2018, panicles in  
230 the seed dispersal phase were collected in May to July for the C-type (21 populations) and  
231 E-type (23 populations) and in October to December for F<sub>1</sub> (25 populations) in 2016–2018  
232 (Figure S1). One hundred twenty-two panicles of C-type and 183 panicles of E-type were  
233 collected in spring and 228 panicles of F<sub>1</sub> in fall. Seed set was evaluated by counting the  
234 spikelets (flowers) and seeds of each panicle. The genotype of each panicle was evaluated using  
235 the CAPS marker in the ITS region described above.

236 Hand pollinations were conducted between different accessions from the same  
237 ecotype: C-type × C-type, E-type × E-type, and F<sub>1</sub> × F<sub>1</sub>. The crossing accession pairs were  
238 isolated in a mesh-covered cubic frame and their panicles were rubbed when their anthers and  
239 stigmas were matured. The seed sets of hand-pollinated C-type, E-type, and F<sub>1</sub> plants in the  
240 experimental farm were evaluated (Table S3). Two accessions of the C-type were from south

241 sites. Two accessions of the E-type were from north sites, and two from south sites. Four  
242 accessions of F<sub>1</sub> were from north sites, and four from south sites. Pairs consisted of accessions  
243 from the same region and each accession was collected from different populations. These plants  
244 were crossed within a pair during April–May 2017 for the C- and E-types and during  
245 September–October 2018 for F<sub>1</sub>. Panicles were collected during May–June 2017 for the C- and  
246 E-types and during November–December 2018 for F<sub>1</sub>. The spikelets and seeds of each panicle  
247 were counted.

248

#### 249 *Germinability tests*

250 In total, 1055, 958, and 99 seeds from 16 populations of the C-type, 22 populations of the  
251 E-type, and 14 populations of F<sub>1</sub>, respectively, were subjected to germination test. The seeds  
252 were collected during the survey of seed sets in 2016–2018 (Figure S1). Seeds of cogongrass  
253 are non-dormant, and seedling emergence occurs soon after seed dispersal (Matumura et al.  
254 1983; Shilling et al. 1997); therefore, seed germination tests were conducted immediately  
255 (within 2 months) after seed collection.

256 Under the outside condition, 271 seeds of the C-type and 433 seeds of the E-type were  
257 sown on 23 May and 13 June 2017 and on 20 June 2018. Fifty-eight seeds set on F<sub>1</sub> were sown  
258 on 19 December 2016 and 4 December 2017. Germination tests were conducted on 4 December



259 2017 using 177 seeds of the C-type, as seeds set on F<sub>1</sub> were too few to check the germinability  
260 of those sown in winter. The C-type seeds were collected during June–July 2017 in north and  
261 south sites and were stored at 4°C in a refrigerator. Seeds were sown on the surface of potting  
262 soil (Takii & Co., Ltd., Kyoto, Japan) in a plastic pot (23.2-cm diameter × 29.7-cm height) in  
263 the experimental farm of Kyoto University. Seed germination was observed daily for 1 month.  
264 For seeds set on F<sub>1</sub>, seed germination was observed daily until the following June.

265 Under controlled conditions, 784 seeds of the C-type and 525 seeds of the E-type were  
266 sown on 24 May, 16 June, and 21 August 2017 and on 20 June 2018 in a growth chamber  
267 (Biorton NC-220S, NK system, Japan). Forty-one seeds set on F<sub>1</sub> were sown on 19 December  
268 2016 and 4 December 2017. In addition to F<sub>1</sub>, germination tests were conducted on 4 December  
269 2017 using 160 seeds of the C-type collected during June–July 2017 in north and south sites and  
270 stored at 4°C in a refrigerator. Seed germination tests were conducted on filter paper in Petri  
271 dishes under 12 h light/dark and 30/20°C, the optimal conditions for seed germination of  
272 cogongrass (Matumura et al. 1983; Mizuguti et al. 2002). In addition to natural seeds, seed  
273 germination tests were conducted using seeds produced by artificial crossing of the  
274 above-mentioned four pairs of F<sub>1</sub> plants (Table S3). Seed germination tests were conducted on  
275 filter paper in Petri dishes under 12 h light/dark at 30/20°C, 25/15°C, 20/10°C, and 15/5°C

276 using 103, 90, 90, and 109 seeds, respectively. Seed germination was observed daily for 1  
277 month.

278

### 279 *Statistical analysis*

280 All tests were two-tailed, and the significance level was set at  $P < 0.05$ . Hybridisation  
281 percentage (hybridised: 1/no: 0), flowering percentage (flowered: 1/no: 0), seed set percentage  
282 (set: 1/no: 0), and germination percentage (germinated: 1/no: 0) in the natural habitats were  
283 compared among genotypes (ecotypes and F<sub>1</sub> hybrids) using generalised linear mixed models  
284 (GLMM) constructed using the package ‘lme4’ (Bates et al. 2015) in R 3.5.1 software (R Core  
285 Team 2018). The model assumed a binominal distribution and a logit link function. The  
286 genotypes were treated as fixed effects. The origin of the populations was treated as a random  
287 effect. Pairwise significant differences were identified by *post hoc* tests for GLMM (Tukey  
288 honestly significant difference test) using the package ‘multcomp’ (Hothorn et al. 2008) in R  
289 3.5.1.

290

## 291 **Results**

### 292 *Population genetic structure of cogongrass*

293 To investigate the genetic structure of cogongrass in Japan, we developed 12 nuclear and one  
294 CAPS chloroplast markers (Figure S3; Table S4). Fifty-three SNPs were detected using the 12  
295 nuclear markers from 223 accessions of cogongrass. Haplotypes in four regions, *ppc-C4*, ITS,  
296 EST72, and EST104, were not shared by the C- and E-types in Japan (Figure S3; Table S4),  
297 supporting the previously suggested genetic isolation of the two ecotypes (Mizuguti et al. 2004;  
298 Nomura et al. 2015). F<sub>2</sub> genotypes were investigated using four molecular markers that can  
299 distinguish ecotypes and hybrids: *ppc-C4*, EST72, ITS\_CAPS, and EST104\_CAPS (Table S2).  
300 These four regions showed very low coefficients of linkage disequilibrium in an analysis of 28  
301 putative F<sub>2</sub> s, suggesting that they are located on different chromosomes (Table S5).

302 PCoA based on the 12 nuclear markers separated 223 accessions into three clusters  
303 along PCo1 (Figure 3B). The chloroplast CAPS marker, which is used to distinguish maternal  
304 ecotypes, revealed that the clusters at both sides of PCo1 corresponded to the C- and E-types  
305 (Figure 3B). The cluster in the middle of PCo1 was considered putative hybrids between  
306 ecotypes. In a STRUCTURE analysis, the number of optimum clusters was estimated to be  $K =$   
307 2 by Evanno  $\Delta K$  (Figure 3C), implying that Japanese cogongrass populations are composed of  
308 two genetic clusters. All of the putative hybrids showed  $q$  values of around 0.5, suggesting that  
309 they had half of the genomes of the C-type and half of the E-type. A NEWPHYBRIDS analysis  
310 assigned the two ecotypes and putative hybrids to parental classes and the F<sub>1</sub> hybrid class,

311 respectively (Figure 3C). There was no putative F<sub>2</sub> hybrid or backcross individual, except for  
312 one accession that belonged to the E-type cluster but carried the C-type haplotype of cpDNA. In  
313 the first survey of 223 populations using 12 nuclear markers, F<sub>1</sub>s were found in a few  
314 geographic locations, namely the north and south sites. We further investigated 127 accessions  
315 of F<sub>1</sub> populations using the ITS CAPS marker, which was developed to discriminate the C-type,  
316 E-type, and F<sub>1</sub>. The distribution pattern of F<sub>1</sub>s was similar to the first survey. These F<sub>1</sub> plants  
317 were found where C- and E-types share habitats. The majority (85%) of the F<sub>1</sub> hybrids exhibited  
318 the E-type cpDNA haplotype, indicating that the E-type tends to be the maternal parent of  
319 hybrids, as supported by the hybridisation percentage in natural habitats (Figure 3D).

320           The occurrence and direction of hybridisation events between the C- and E-types were  
321 investigated in natural habitats sympatrically colonised by the C- and E-types (north and south  
322 sites). Five hundred ninety-nine seeds set on 50 panicles of the C-type, and 481 seeds set on 50  
323 panicles of the E-type were collected from 10 and 14 populations in natural habitats,  
324 respectively. CAPS analysis of the ITS region of the progeny revealed a low percentage (~1.2%)  
325 of hybridisation in south sites (Figure 3D). In contrast, north site populations exhibited a higher  
326 percentage of hybridisation (~40%). The direction of hybridisation was asymmetric in both  
327 regions: significantly more F<sub>1</sub> plants were observed among the seedlings from E-type seed

328 parents (GLMM,  $P < 0.01$ ). This result is consistent with the observation that the majority of  $F_1$   
329 hybrids in the wild exhibit E-type cpDNA haplotypes (Figure 3C).

330

331 *Morphological traits of the ecotypes and  $F_1$*

332 Culms, leaf sheathes (Tominaga et al. 1989; Mizuguti et al. 2003), and midrib aerenchyma (A.

333 Nishiwaki & A. Mizuguti unpublished data) are different between the C- and E-types. The

334 C-type had hairs on culm nodes and leaf sheathes and no wax on leaf sheaths, whereas the

335 E-type had no hairs on culm nodes or leaf sheathes and had wax on the leaf sheaths (Figure 1,

336 S4). The C-type also had a smaller ratio of midrib aerenchyma to midrib diameter than the

337 E-type had. In addition to the previously identified ecotype-specific characteristics, we

338 investigated rhizome aerenchyma based on the assumption that the habitat of soil moisture

339 contents of the ecotypes may be associated with their rhizome structures. We found that the size

340 of rhizome aerenchyma differed between ecotypes; the C-type had small aerenchyma, and the

341 E-type had large aerenchyma.

342  $F_1$  showed a wide range of variation in morphology; various numbers of hairs on culm,

343 no or few hairs and little wax on sheathes, and an intermediate ratio of aerenchyma. As a result,

344  $F_1$  was located in an intermediated position between parental ecotypes on axis 1 of PCA (Figure

345 3A). The C- and E-types and  $F_1$  were divided into three groups by PCA. The axis 1 was

346 associated with hairs on culms, sheath was, sheath hairs, and rhizome aerenchyma, indicating  
347 that they are the most diagnostic of hybridisation. Therefore, the C- and E-types and  $F_1$  were  
348 distinct, not only genetically but also morphologically.

349

### 350 *Flowering phenology and reproduction of $F_1$*

351 Population genetic analyses revealed that hybrid individuals were  $F_1$ s, suggesting reproductive  
352 isolation of  $F_1$  plants from their parents (backcross) and prevention of  $F_1 \times F_1$  crossing. We first  
353 investigated the flowering period of the C- and E-types and  $F_1$  in the fields to assess the  
354 occurrence of reproductive isolation between  $F_1$  and the two ecotypes. The number of ramets at  
355 the flowering stage was counted in 64 populations. The genotype of each ramet was later  
356 investigated using the CAPS marker in the ITS region. Three hundred one (66.9%) of 450  
357 ramets of the C-type and 345 (77.9%) of 443 ramets of the E-type were in the flowering stage in  
358 spring, in agreement with previous reports (Matumura and Yukimura 1980; Tominaga et al.  
359 1989) (Figure 4A) (Tukey HSD,  $P < 0.001$ ). In contrast, only 11 (2.0%) of 552 ramets of  $F_1$   
360 flowered in spring. In fall, up to 48.0% of  $F_1$  ramets (581/1211) flowered, compared to only  
361 5.3% of C-type and 1.6% of E-type ramets (Tukey HSD,  $P < 0.001$ ). The flowering phenology  
362 of  $F_1$  plants was not affected by cpDNA type (Figure S5).

363 To validate the late flowering of  $F_1$  in natural habitats, we generated artificial  $F_1$  plants  
364 of eight reciprocal sets and monitored their flowering phenology from April to November in  
365 2018 at the experimental farm. During mid-April, flowering of E-type accessions peaked  
366 (Figure 4B). Approximately 1 month later, flowering of the C-type peaked. During this period,  
367 none of the  $F_1$  plants flowered. In contrast,  $F_1$  sporadically flowered from September to  
368 November, as observed for wild  $F_1$  populations. The results indicate that hybridisation between  
369 the C- and E-types of cogongrass delays the flowering of  $F_1$  progeny to fall, which prevent  $F_1$ s  
370 from crossing with the parental ecotypes.

371 Next, to clarify the mechanism of prevention of  $F_1 \times F_1$  crossing, we surveyed seed  
372 sets on  $F_1$  plants in natural habitats from 25 populations in fall. The C-type produced more  
373 flowers than the E-type (359.1 and 246.1 on average, respectively), as reported previously  
374 (Matumura et al. 1983).  $F_1$  plants produced 368.6 flowers on average, suggesting that they had  
375 the same ability to produce flowers as the C-type. The average seed set, however, was 0.12%  
376 (0.0–2.5%); thus, most of the  $F_1$  panicles in natural habitats did not carry mature seeds (Figure  
377 5A). In contrast, our spring survey showed that the average seed set of the C- and E-types in  
378 natural habitats was approximately 70-fold higher than that of  $F_1$  plants (Tukey HSD,  $P <$   
379 0.001): 7.1% (0.0–70.6%) for the C-type and 9.0% (0.0–60.7%) for the E-type. A similar seed  
380 set percentage, 8.7% (0.6–24.7%), was observed in  $F_1$  plants when different populations were

381 artificially crossed (Figure 5A), suggesting that  $F_1$  plants have an extremely low seed set in  
382 natural habitats, although they can produce offspring at rates similar to the C- and E-types.

383 We also investigated the viability of seeds derived from  $F_1 \times F_1$  crosses. Seeds  
384 collected from artificial  $F_1 \times F_1$  crosses were subjected to germination tests at various  
385 temperatures. As reported for the C- and E-types (Matumura et al. 1983; Mizuguti et al. 2002),  
386 the frequency of germination was high at 30/20°C, although none of the seeds germinated at  
387 15/5°C (Figure 5B). Under the optimal conditions, mature seeds on  $F_1$  plants in natural habitats  
388 were also tested for germination immediately after seed collection, as seeds of cogongrass do  
389 not exhibit dormancy (Matumura et al. 1983; Shilling et al. 1997). A significantly lower and  
390 similar germination percentage compared to seeds of C- and E-type plants from natural habitats  
391 were observed in  $F_1$  plants, respectively (C-type, Tukey HSD,  $P < 0.05$ ; E-type, Tukey HSD,  $P$   
392 = 0.64) (Figure 5B). When the seeds were sown outside, however, the pattern of germination  
393 differed between  $F_1$  and the parental ecotypes (C-type, Tukey HSD,  $P < 0.001$ ; E-type, Tukey  
394 HSD,  $P < 0.05$ ). Seeds of C- and E-types that were sown in May to June had a higher  
395 germination percentage: 64.9% (176 seeds) for the C-type and 40.4% (179 seeds) for the E-type.  
396 In contrast, seeds from  $F_1$  plants in the natural habitats exhibited a low germination percentage  
397 when sown in December. Only 1 of the 58 seeds used for the experiment emerged by the  
398 following June. That seed germinated in April, when the average temperature was 16.4°C. We



399 also used C-type seeds for the overwinter experiment due to the limited number of seeds from  
400 F<sub>1</sub> plants. In total, 160 C-type seeds from six panicles (likely from different ramets), collected in  
401 June to July and stored at 4°C, were sown in the following December. Consistent with the result  
402 of seeds from F<sub>1</sub> plants, a low germination percentage (7 of 177 seeds) was observed in C-type  
403 seeds sown in winter compared to in spring–summer: 0% germination in 117 seeds from five  
404 panicles and 11.7% germination in 60 seeds from one panicle (Figure S6) (GLMM,  $P < 0.001$ ).

405

## 406 **Discussion**

### 407 *Drastic shift in flowering phenology shapes population structures*

408 In the genetic population structure of cogongrass in Japan, we found that hybrids between C-  
409 and E-type comprised only F<sub>1</sub> generation except for one accession (Figure 3C). Four or five  
410 markers are enough to distinguish F<sub>1</sub> from F<sub>2</sub> or backcross individuals (Boecklen and Howard  
411 1997). Therefore, used markers are a few in this study but classification by NEWHYBRIDS is  
412 appropriate. Origin of one accession with mismatched nuclear and chloroplast DNA types is  
413 unclear. It may be a chloroplast capture or an incomplete lineage sorting (Rieseberg and Soltis  
414 1991; Kuritzin et al. 2016). The fact that F<sub>1</sub> plants were identified in materials collected 30 years  
415 ago indicates that backcrossing and F<sub>1</sub> × F<sub>1</sub> crossing events have been prevented for at least 30  
416 years. Investigation of F<sub>1</sub> phenology revealed that they flowered in fall, whereas the parental

417 ecotypes flowered in spring (Figure 4), which acts as a reproductive barrier to backcrossing. Our  
418 survey of the seed setting of  $F_1$  plants in natural habitats in fall suggests that the success rate of  
419  $F_1 \times F_1$  crossing is 70-fold lower than that of the C- and E-types in spring (Figure 5A). Also, the  
420 germination percentage of the seeds set on  $F_1$  under the outside condition was markedly lower  
421 than that of the C- and E-types (Figure 5B). Notably,  $F_1$  plants possessed the potential for seed  
422 propagation, as did the C- and E-types. A high level of seed setting by  $F_1 \times F_1$  crossing was  
423 observed in hand pollination between plants from distinct populations (Figure 5A); the  
424 germination percentage was higher under warmer conditions (Figure 5B). Thus, the lower seed  
425 set and germination under natural conditions were likely caused by interactions with  
426 environmental parameters, such as temperature and population structure, which  $F_1$  plants  
427 confront as a result of drastic shifts in flowering phenology. Previous study demonstrated that  
428 some accessions of artificial  $F_1$  showed higher performance for biomass production than  
429 parental ecotypes under dry and wet conditions (Miyoshi and Tominaga 2017). Together, our  
430 data indicate that the peculiar  $F_1$  population structure of cogongrass is caused by loss of seed  
431 propagation, mediated by the drastic shift in flowering phenology, and it has been maintained by  
432 vigorous clonal reproduction via rhizomes (Figure 6).

433         Normal growth of artificially generated pseudo-  $F_2$  individuals (data not shown)  
434 indicates the existence of extrinsic mechanism(s) of excluding  $F_2$  plants in nature. Our data

435 suggest that two events likely explain the absence of  $F_2$  plants: the exceptionally low  
436 seed-setting percentage of  $F_1$  plants and the low germination percentage of seeds dispersed in  
437 winter. The former mechanism(s) under natural conditions is unknown but is unlikely to be an  
438 environmental parameter such as temperature, based on the higher seed-setting percentage in  
439 our artificial crossing experiment in fall (Figure 5B) and the normal germination of  $F_1$  pollen in  
440 fall (T. Tominaga, unpublished data). The following are more plausible hypotheses: (1) Genetic  
441 diversity within/among  $F_1$  populations may affect seed setting percentage. Cogongrass can have  
442 a diverse seed setting percentages, which, due to its self-incompatible and outcrossing nature,  
443 would depend on the population genetic diversity (Shilling et al. 1997).  $F_1$  populations may hold  
444 insufficient genetic diversity to have a higher seed-setting percentage. (2) Non-synchronous  
445 flowering of  $F_1$  plants may affect the seed setting percentage. Contrary to the C- and E-types,  
446 flowering of  $F_1$  individuals occurred sporadically, and the flowering period was roughly 2  
447 months, twofold longer than that of the C- and E-types (Figure 4B). Synchronisation of  
448 flowering would have a marked impact on the seed setting percentage of cogongrass. Further  
449 studies of the genetic population structures within/among  $F_1$  populations and the flowering  
450 period under natural conditions are needed to assess the low seed-setting percentage of  $F_1$   
451 plants.

452           The exceptionally low germination percentage of the seeds dispersed in winter would  
453 also prevent the existence of  $F_2$  plants within hybrid populations. The germination percentage of  
454 the seeds sown in winter was 30-fold lower than that of seeds sown in spring. Given the low  
455 seed-setting percentage of  $F_1$  plants, roughly 0.05% that of the C- and E-types, an extremely low  
456 percentage of seedling establishment would be expected. In addition, our data may overestimate  
457 the germination percentage. In this study, we sowed the field-collected seeds in December,  
458 when cogongrass germination is suppressed by low temperature. In nature, however, seeds set  
459 and dispersed in early fall (such as September to early October) may germinate before winter.  
460 The seedlings are unlikely to overwinter because of insufficient rhizome development due to  
461 low temperature. Further investigation of seed dynamics, especially in nature, is required to  
462 understand the mechanism that prevents successful  $F_1 \times F_1$  crossing.

463

#### 464 *Role of instant reproductive isolation on evolution*

465 We identified a mechanism of instant reproductive isolation, in which almost complete  
466 reproductive isolation is established in one generation due to the self-incompatible and  
467 perennial nature of cogongrass. The former prevents generation of  $F_2$  plants, and the latter  
468 allowed the late-flowering hybrids to remain in the habitat by clonal reproduction (Figure 6).  
469 Furthermore, these characteristics have led to the population structure of hybrids with only  $F_1$

470 plants (Milne and Abbott 2008). Similarly, hybrid populations comprising only the  $F_1$  generation  
471 have been reported in perennial plants including herbaceous plants and woods (Nason et al.  
472 1992; Kuehn et al. 1999; Milne et al. 2003; Kameyama et al. 2008; Milne and Abbott 2008; Zha  
473 et al. 2010; Nagano et al. 2015). These previous studies have proposed two major hypotheses on  
474 the absence of  $F_2$  and backcross hybrids: one is an extrinsic factor and the other is an intrinsic  
475 factor (Nason et al. 1992; Kuehn et al. 1999; Milne et al. 2003; Kameyama et al. 2008; Milne  
476 and Abbott 2008; Kameyama and Kudo 2011). The extrinsic factor hypothesis explains that a  
477 parental environment is unsuitable for  $F_2$  and backcross hybrids (Nason et al. 1992; Milne et al.  
478 2003; Milne and Abbott 2008), while the intrinsic factor hypothesis explains that hybrid  
479 breakdown occurs (Kuehn et al. 1999; Kameyama et al. 2008; Kameyama and Kudo 2011).  
480 However, no direct factor determining population structure has been identified in above  
481 mentioned studies.

482  $F_1$  progeny showed an intermediate morphology between the C- and E-types (Figure  
483 3A, S4). The ecological roles of the traits investigated in this study are unknown, even in the  
484 parental ecotypes. However, the difference in morphology, particularly in rhizome aerenchyma,  
485 among the C-type, E-type, and  $F_1$  may influence the preference of habitat. In our observations,  
486  $F_1$  plants were found in a wider range of soil moisture conditions than their parents (Nomura et  
487 al., in prep.), whereas the C- and E-types preferred relatively dry and wet habitats, respectively.

488 This species is a worldwide noxious weed and has a wide range of distribution (Holm et al.  
489 1977; MacDonald 2004; Burrell et al. 2015). This species is intentionally introduced as an  
490 ornament or forage grass and escapes unintentionally to natural habitats, expanding its  
491 distribution (MacDonald 2004; Cseke and Talley 2012; Burrell et al. 2015). If  
492 intentional/unintentional introduction provide F<sub>1</sub> plants a chance to be distributed to a warm  
493 region where F<sub>1</sub> can sexually reproduce, F<sub>1</sub> will evolve into a new invasive taxon without  
494 backcrossing with parental species. Further studies of the role of rhizome aerenchyma in  
495 environmental preference may shed further light on the distribution of cogongrass in Japan.

496

#### 497 *Regulation of flowering phenology*

498 To ensure reproductive success, plants must regulate flowering to synchronise with optimal  
499 environmental conditions for seed production. A large number of molecular players are involved  
500 in the regulation of flowering in plants (Hill and Li 2016), which allows plants to fine-tune the  
501 flowering period. These players often function in an additive manner (Martin and Willis 2007;  
502 Martin et al. 2007; Buckler et al. 2009); therefore, crossing between individuals with different  
503 flowering periods often results in an intermediate flowering period. In contrast, marked delay of  
504 flowering has been observed in F<sub>1</sub> hybrids of particular ecotypes/lines of *Arabidopsis thaliana*  
505 (L.) Heynh. (Koornneef et al. 1994; Henderson and Dean 2004) and *Sorghum bicolor* (L.)

506 Moench (Murphy et al. 2014; Yang et al. 2014). In both cases, the parental ecotypes/lines have a  
507 disrupted form of a floral repressor or its activator in the floral regulatory pathway, which lifts  
508 the repression of flowering. Hybridisation of the two ecotypes/lines restores the flowering  
509 repression pathway because the hybrids carry functional alleles of each gene. The genes  
510 involved in the delayed phenology differ between *A. thaliana* and *S. bicolor* although their basic  
511 relationship as a floral repressor and its activator is identical. The genes related to the delayed  
512 phenology of F<sub>1</sub> in cogongrass are unknown. We speculate that similar molecular mechanisms  
513 as in *S. bicolor* are involved in the delayed phenology in cogongrass because the two species are  
514 evolutionarily similar—both are in the tribe Andropogoneae. Genomic and transcriptomic  
515 approaches will enhance our understanding of the dynamic flowering shift in cogongrass.

516

### 517 *Conclusion*

518 A novel phenotype derived from hybridisation between two ecotypes has major effects on the  
519 population structure of cogongrass. The fact that hybrid populations consist of almost of all F<sub>1</sub>  
520 plants implies that the F<sub>1</sub> progeny of C- and E-type cogongrass lose their sexual reproduction  
521 system and only reproduce asexually. Namely, hybridisation of the two ecotypes altered not  
522 only the flowering phenology but also the reproductive strategy of cogongrass. Considering that  
523 similar delays in flowering phenology are observed in other plant lineages (*e.g.* *A. thaliana* and

524 *S. bicolor*), it is reasonable to speculate that hybridisations between independently evolved  
525 ecotypes may cause a drastic shift of flowering phenology even in other plants. Our findings  
526 will facilitate investigation of the ecological role of hybridisation in flowering phenology shifts  
527 in other species. Also, the molecular basis of the flowering shift is an exciting challenge for the  
528 future.

529

530

531



532 **Reference**

533 Anderson, E. C., and E. A. Thompson. 2002. A model-based method for identifying species  
534 hybrids using multilocus data. *Genetics* 160:1217–1229.

535 Bates, D., M. Mächler, B. Bolker, and S. Walker. 2015. Fitting linear mixed-effects models  
536 using lme4. *J. Stat. Softw.* 67:1–48.

537 Boecklen, W. J., and D. J. Howard. 1997. Genetic analysis of hybrid zones : Numbers of  
538 markers and power of resolution. *Ecology* 78:2611–2616.

539 Buckler, E. S., J. B. Holland, P. J. Bradbury, C. B. Acharya, P. J. Brown, C. Browne, E. Ersoz,  
540 S. Flint-Garcia, A. Garcia, J. C. Glaubitz, M. M. Goodman, C. Harjes, K. Guill, D. E.

541 Kroon, S. Larsson, N. K. Lepak, H. Li, S. E. Mitchell, G. Pressoir, J. A. Peiffer, M. O.

542 Rosas, T. R. Rocheford, M. C. Romay, S. Romero, S. Salvo, H. S. Villeda, H. Sofia da

543 Silva, Q. Sun, F. Tian, N. Upadhyayula, D. Ware, H. Yates, J. Yu, Z. Zhang, S. Kresovich,

544 and M. D. McMullen. 2009. The genetic architecture of maize flowering time. *Science*  
545 325:714–718.

546 Buerkle, C. A., R. J. Morris, M. A. Asmussen, and L. H. Rieseberg. 2000. The likelihood of  
547 homoploid hybrid speciation. *Heredity* 84:441–451.

- 548 Burrell, A. M., A. E. Pepper, G. Hodnett, J. A. Goolsby, W. A. Overholt, A. E. Racelis, R. Diaz,  
549 and P. E. Klein. 2015. Exploring origins, invasion history and genetic diversity of  
550 *Imperata cylindrica* (L.) P. Beauv. (Cogongrass) in the United States using genotyping by  
551 sequencing. *Mol. Ecol.* 24:2177–2193.
- 552 Coyne, J. A., and H. A. Orr. 2004. *Speciation*. Sinauer, Sunderland, MA U.S.A.
- 553 Cseke, L. J., and S. M. Talley. 2012. A PCR-based genotyping method to distinguish between  
554 wild-type and ornamental varieties of *Imperata cylindrica*. *J. Vis. Exp.* 60:e3265.
- 555 Duenez-Guzman, E. A., J. Mavárez, M. D. Vose, and S. Gavrillets. 2009. Case studies and  
556 mathematical models of ecological speciation. 4. hybrid speciation in butterflies in a  
557 jungle. *Evolution* 63:2611–2626.
- 558 Evanno, G., S. Regnaut, and J. Goudet. 2005. Detecting the number of clusters of individuals  
559 using the software STRUCTURE: a simulation study. *Mol. Ecol.* 14:2611–2620.
- 560 Grant, P. R., and B. R. Grant. 1994. Phenotypic and genetic effects of hybridization in Darwin's  
561 finches. *Evolution* 48:297–316.
- 562 Henderson, I. R., and C. Dean. 2004. Control of *Arabidopsis* flowering: the chill before the  
563 bloom. *Development* 131:3829–3838.

- 564 Hill, C. B., and C. Li. 2016. Genetic architecture of flowering phenology in cereals and  
565 opportunities for crop improvement. *Front. Plant Sci.* 7:1906.
- 566 Holm, L. G., D. L. Plucknett, J. V. Pancho, and J. P. Herberger. 1977. *Imperata cylindrica* (L.)  
567 Beauv. POACEAE (also GRAMINEAE). GRASS FAMILY. Pp. 62–71 in L. G. Holm, D.  
568 L. Plucknett, J. V. Pancho, and J. P. Herberger, eds. *The World's Worst Weeds,*  
569 *Distribution and Biology.* University Press of Hawaii, Honolulu, USA.
- 570 Hothorn, T., F. Bretz, and P. Westfall. 2008. Simultaneous inference in general parametric  
571 models. *Biometrical J.* 50:346–363.
- 572 Jakobsson, M., and N. A. Rosenberg. 2007. CLUMPP: a cluster matching and permutation  
573 program for dealing with label switching and multimodality in analysis of population  
574 structure. *Bioinformatics* 23:1801–1806.
- 575 Johansen-Morris, A. D., and R. G. Latta. 2006. Fitness consequences of hybridization between  
576 ecotypes of *Avena barbata*: hybrid breakdown, hybrid vigor, and transgressive segregation.  
577 *Evolution* 60:1585–1595.
- 578 Kagawa, K., and G. Takimoto. 2018. Hybridization can promote adaptive radiation by means of  
579 transgressive segregation. *Ecol. Lett.* 21:264–274.

- 580 Kameyama, Y., T. Kasagi, and G. Kudo. 2008. A hybrid zone dominated by fertile F1s of two  
581 alpine shrub species, *Phyllodoce caerulea* and *Phyllodoce aleutica*, along a snowmelt  
582 gradient. *J. Evol. Biol.* 21:588–597.
- 583 Kameyama, Y., and G. Kudo. 2011. Clarification of the genetic component of hybrids between  
584 *Phyllodoce caerulea* and *Phyllodoce aleutica* (Ericaceae) in Hokkaido, northern Japan.  
585 *Plant Species Biol.* 26:93–98.
- 586 Koornneef, M., H. Blankestijn-de Vries, C. Hanhart, W. Soppe, and T. Peters. 1994. The  
587 phenotype of some late-flowering mutants is enhanced by a locus on chromosome 5 that is  
588 not effective in the *Landsberg erecta* wild-type. *Plant J.* 6:911–919.
- 589 Kuehn, M. M., J. E. Minor, and B. N. White. 1999. An examination of hybridization between  
590 the cattail species *Typha latifolia* and *Typha angustifolia* using random amplified  
591 polymorphic DNA and chloroplast DNA markers. *Mol. Ecol.* 8:1981–1990.
- 592 Kuritzin, A., T. Kischka, J. Schmitz, and G. Churakov. 2016. Incomplete lineage sorting and  
593 hybridization statistics for large-scale retroposon insertion data. *PLoS Comput. Biol.* 12:1–  
594 20.

- 595 Lamichhane, S., F. Han, M. T. Webster, L. Andersson, B. R. Grant, and P. R. Grant. 2018.  
596 Rapid hybrid speciation in Darwin's finches. *Science* 359:224–228.
- 597 MacDonald, G. E. 2004. Cogongrass (*Imperata cylindrica*) -Biology, Ecology, and  
598 Management. *CRC. Crit. Rev. Plant Sci.* 23:367–380.
- 599 Mallet, J. 2007. Hybrid speciation. *Nature* 446:279–283.
- 600 Marques, I., A. Jürgens, J. F. Aguilar, and G. N. Feliner. 2016. Convergent recruitment of new  
601 pollinators is triggered by independent hybridization events in *Narcissus*. *New Phytol.*  
602 210:731–742.
- 603 Martin, N. H., A. C. Bouck, and M. L. Arnold. 2007. The genetic architecture of reproductive  
604 isolation in Louisiana irises: flowering phenology. *Genetics* 175:1803–1812.
- 605 Martin, N. H., and J. H. Willis. 2007. Ecological divergence associated with mating system  
606 causes nearly complete reproductive isolation between sympatric *Mimulus* species.  
607 *Evolution* 61:68–82.
- 608 Matumura, M., and T. Yukimura. 1980. The comparative ecology of intraspecific variants of the  
609 Chigaya, *Imperata cylindrica* var. *koenigii* (Alang-alang) . (1) Habitats of the common and

- 610 early flowering types of the Chigaya based on the vegetation characteristics. Res. Bull. Fac.  
611 Coll. Agric. Gifu Univ. 43:233–248. [In Japanese with English abstract]
- 612 Matumura, M., T. Yukimura, and S. Shinoda. 1983. Fundamental studies on artificial  
613 propagation by seeding useful wild grasses in Japan IX. Seed fertility and germinability of  
614 the intraspecific two types of Chigaya (Alang-alang), *Imperata cylindrica* var. *koenigii*. J.  
615 Japanese Grassl. Sci. 28:395–404.
- 616 Mavárez, J., C. A. Salazar, E. Bermingham, C. Salcedo, C. D. Jiggins, and M. Linares. 2006.  
617 Speciation by hybridization in *Heliconius* butterflies. Nature 441:868–871.
- 618 Milne, R. I., and R. J. Abbott. 2008. Reproductive isolation among two interfertile  
619 *Rhododendron* species: low frequency of post-F1 hybrid genotypes in alpine hybrid zones.  
620 Mol. Ecol. 17:1108–1121.
- 621 Milne, R. I., S. Terzioglu, and R. J. Abbott. 2003. A hybrid zone dominated by fertile F1s:  
622 maintenance of species barriers in *Rhododendron*. Mol. Ecol. 12:2719–2729.
- 623 Miyoshi, I., and T. Tominaga. 2017. Growth of hybrids between the common and early  
624 ecotypes of *Imperata cylindrica*. Grassl. Sci. 63:128–131.

- 625 Mizuguti, A., A. Nishiwaki, and M. Oyamada. 2002. Differences of seed germination characters  
626 between two types of *Imperata cylindrica* (L.) Beauv. characterized by flowering  
627 phenology. Grassl. Sci. 48:216–220. [In Japanese with English abstract]
- 628 Mizuguti, A., A. Nishiwaki, and Y. Sugimoto. 2004. Genetic difference between two types of  
629 *Imperata cylindrica* (L.) Beauv. characterized by flowering phenology. Grassl. Sci. 50:9–  
630 14.
- 631 Mizuguti, A., A. Nishiwaki, and Y. Sugimoto. 2003. Morphological differences between two  
632 types of *Imperata cylindrica* (L.) BEAUV. characterized by flowering phenology. Grassl.  
633 Sci. 49:324–329. [In Japanese with English abstract]
- 634 Murphy, R. L., D. T. Morishige, J. A. Brady, W. L. Rooney, S. Yang, P. E. Klein, and J. E.  
635 Mullet. 2014. *Ghd7* (*Ma6*) represses Sorghum flowering in long days: alleles enhance  
636 biomass accumulation and grain production. Plant Genome 7:1–10.
- 637 Murray, M. G., and W. F. Thompson. 1980. Rapid isolation of high molecular weight plant  
638 DNA. Nucleic Acids Res. 8:4321–4326.

- 639 Nagano, Y., A. S. Hirao, and T. Itino. 2015. Genetic structure of a hybrid zone between two  
640 violets, *Viola rossii* Hemsl. and *V. bissetii* Maxim.: dominance of F1 individuals in a  
641 narrow contact range. *Plant Species Biol.* 30:237–243.
- 642 Nason, J. D., N. C. Ellstrand, and M. L. Arnold. 1992. Patterns of hybridization and  
643 introgression in populations of oaks, manzanitas, and irises. *Am. J. Bot.* 79:101–111.
- 644 Nomura, Y., Y. Shimono, and T. Tominaga. 2015. Development of chloroplast DNA markers in  
645 Japanese *Imperata cylindrica*. *Weed Res.* 55:329–333.
- 646 Peakall, R., and P. E. Smouse. 2006. GENALEX 6: genetic analysis in Excel. Population  
647 genetic software for teaching and research. *Mol. Ecol. Notes* 6:288–295.
- 648 Peakall, R., and P. E. Smouse. 2012. GenALEX 6.5: genetic analysis in Excel. Population  
649 genetic software for teaching and research-an update. *Bioinformatics* 28:2537–2539.
- 650 Pritchard, J. K., M. Stephens, and P. Donnelly. 2000. Inference of population structure using  
651 multilocus genotype data. *Genetics* 155:945–959.
- 652 R Core Team. 2018. R: A language and environment for statistical computing. R Foundation for  
653 Statistical Computing, Vienna, Austria.



- 654 Rieseberg, L. H., and D. E. Soltis. 1991. Phylogenetic consequences of cytoplasmic gene flow  
655 in plants. *Evol. Trends Plants* 5:65–84.
- 656 Selz, O. M., R. Thommen, M. E. Maan, and O. Seehausen. 2014. Behavioural isolation may  
657 facilitate homoploid hybrid speciation in cichlid fish. *J. Evol. Biol.* 27:275–289.
- 658 Shilling, D. G., T. A. Bewick, J. F. Gaffney, S. K. McDonald, C. A. Chase, and E. R. R. L.  
659 Johnson. 1997. Ecology, Physiology, and Management of Cogongrass (*Imperata*  
660 *Cylindrica*): Final Report. Florida Institute of Phosphate Research. Institute of Food and  
661 Agricultural Sciences, University of Florida, Gainesville, Florida.
- 662 Soltis, P. S., D. B. Marchant, Y. Van de Peer, and D. E. Soltis. 2015. Polyploidy and genome  
663 evolution in plants. *Curr. Opin. Genet. Dev.* 35:119–125.
- 664 Soltis, P. S., and D. E. Soltis. 2009. The role of hybridization in plant speciation. *Annu. Rev.*  
665 *Plant Biol.* 60:561–588.
- 666 Stephens, M., N. J. Smith, and P. Donnelly. 2001. A new statistical method for haplotype  
667 reconstruction from population data. *Am. J. Hum. Genet.* 68:978–989.

- 668 Taylor, S. J., L. D. Rojas, S. W. Ho, and N. H. Martin. 2013. Genomic collinearity and the  
669 genetic architecture of floral differences between the homoploid hybrid species *Iris*  
670 *nelsonii* and one of its progenitors, *Iris hexagona*. *Heredity* (Edinb). 110:63–70.
- 671 Tominaga, T., H. Kobayashi, and K. Ueki. 1989. Geographical variation of *Imperata cylindrica*  
672 (L.) Beauv. in Japan. *J. Japanese Grassl. Sci.* 35:164–171.
- 673 Tominaga, T., A. Nishiwaki, A. Mizuguti, and T. Ezaki. 2007. Weed Monograph 5. *Imperata*  
674 *cylindrica* (L.) Beauv. *J. Weed Sci. Technol.* 52:17–27 [In Japanese].
- 675 Wood, T. E., N. Takebayashi, M. S. Barker, I. Mayrose, P. B. Greenspoon, and L. H. Rieseberg.  
676 2009. The frequency of polyploid speciation in vascular plants. *Proc. Natl. Acad. Sci.*  
677 106:13875–13879.
- 678 Yang, S., R. L. Murphy, D. T. Morishige, P. E. Klein, W. L. Rooney, and J. E. Mullet. 2014.  
679 Sorghum phytochrome B inhibits flowering in long days by activating expression of  
680 *SbPRR37* and *SbGHD7*, repressors of *SbEHD1*, *SbCN8* and *SbCN12*. *PLoS One*  
681 9:e105352.
- 682 Yasuda, K., and H. Shibayama. 2006. Primer sets for DNA amplification of the noncoding  
683 regions of the chloroplast genome in the grass family. *J. Weed Sci. Technol.* 51:146–151.

- 684 Zha, H. G., R. I. Milne, and H. Sun. 2010. Asymmetric hybridization in *Rhododendron*
- 685 *agastum*: a hybrid taxon comprising mainly F1s in Yunnan, China. *Ann. Bot.* 105:89–100.
- 686
- 687

688 Figure 1

689 Title: Morphology of C-, E-type and hybrids

690 Legends: Bars in right bottom of photos are scale bars. Scale bars mean 1 cm, 1 cm, 0.5 cm and

691 250  $\mu$ m in rhizomes, leaf sheathes, culms and leaf midribs, respectively.

692

693 Figure 2

694 Title: Sampling location and distribution of each ecotype

695 Legends: Ecotypes were determined using CAPS marker in ITS region.

696

697 Figure 3

698 Title: Differentiation between C- and E-type and hybridisation percentage

699 Legends: Results of PCA for morphological traits (A). Results of PCoA for 12 markers in

700 nuclear DNA (B). Results of analysis for cpDNA and STRUCTURE and NEWHYBRIDS for

701 12 markers in nuclear DNA (C). Top, middle and bottom figures are results of analysis for

702 cpDNA, STRUCTURE and NEWHYBRIDS. Hybridisation percentage in natural habitats (D).

703 X-axis means genotypes of panicles (C- or E-type) and study sites (north and south sites). Points

704 means hybridisation percentage per each population (surveyed panicles in north sites: C-type, n

705 = 377; E-type, n = 395; south sites: C-type, n = 222; E-type, n = 86). Hybridisation percentage  
706 of E-type is significantly higher than that of C-type (GLMM,  $P < 0.01$ ).

707

708 Figure 4

709 Title: Flowering phenology of C-, E-type and F<sub>1</sub>

710 Legends: Flowering phenology in natural populations (A). Flowering percentage means  
711 (flowering ramets/all ramets) x 100 (surveyed ramets in spring: C-type, n = 407; E-type, n =  
712 404; F<sub>1</sub>, n = 532; fall: C-type, n = 264; E-type, n = 252; F<sub>1</sub>, n = 1161). Values and error bars  
713 represent means ± s.e.m. Flowering percentage of F<sub>1</sub> is significantly lower than that of C-type  
714 and E-type in spring while that of F<sub>1</sub> is significantly higher than that of C-type and E-type in fall  
715 (Tukey HSD,  $P < 0.001$ ). Flowering phenology in Kyoto experimental farm (B).

716

717 Figure 5

718 Title: Viability in sexual reproduction of C-, E-type and F<sub>1</sub>

719 Legends: Seed set analysis in natural habitats and an experimental field (A). Symbols mean a  
720 year in which an experiment was conducted in natural habitats (surveyed panicles: C-type, n =  
721 122; E-type, n = 183; F<sub>1</sub>, n = 228). Seed setting of F<sub>1</sub> is significantly lower than that of C-type  
722 and E-type (Tukey HSD,  $P < 0.001$ ). Seed set percentage of hand-pollinated ecotypes and F<sub>1</sub>

723 was measured in an experimental field of Kyoto University (surveyed panicles: C-type,  $n = 7$ ;  
724 E-type,  $n = 9$ ;  $F_1$ ,  $n = 20$ ). Seed setting of  $F_1$  is not significantly differ from that of C-type  
725 (Tukey HSD,  $P = 0.996$ ) and significantly lower than that of E-type (Tukey HSD,  $P < 0.01$ ).  
726 Germination tests of seeds from natural habitats or artificial pollination (B). Left panel shows  
727 germination test of natural seeds under an incubator and an outside condition. Germination tests  
728 in incubator were conducted under 30/20°C, light/dark condition. C- and E-type seeds were  
729 sown in summer (May-August), while seeds set on  $F_1$  were sown in winter (December)  
730 (surveyed seeds under incubator: C-type,  $n = 784$ ; E-type,  $n = 525$ ;  $F_1$ ,  $n = 41$ ; outside: C-type,  $n$   
731  $= 271$ ; E-type,  $n = 443$ ;  $F_1$ ,  $n = 58$ ). Germination percentage of  $F_1$  is not significantly differ from  
732 that of E-type (Tukey HSD,  $P = 0.64$ ) and significantly lower than that of C-type (Tukey HSD,  
733  $P < 0.05$ ) under the incubator condition. On the other hands, germination percentage of  $F_1$  is  
734 significantly lower than that of C-type (Tukey HSD,  $P < 0.001$ ) and E-type (Tukey HSD,  $P <$   
735  $0.05$ ) under the outside condition. Right panel shows germination percentage of seeds produced  
736 from  $F_1 \times F_1$  cross under four temperature conditions (surveyed seeds: 5–15°C,  $n = 109$ ; 10–  
737 20°C,  $n = 90$ ; 15–25°C,  $n = 90$ ; 20–30°C,  $n = 103$ ). All points in three panels means seed set or  
738 germination percentage per each population or cross treatment.

739

740 Figure 6

741 Title: Mechanism of F<sub>1</sub> domination in hybrid population

742 Legends: C- and E-type flower in spring and disperse their seeds in summer. Seedlings are  
743 likely to be establish, because seeds of C- and E-type are dispersed in a warm season. In  
744 contrast, F<sub>1</sub> flowers in fall and disperse their seeds in winter. This suggests that seeds set on F<sub>1</sub>  
745 are not able to germinate and are dead, because they are dispersed in a cold season.

746

#### 747 **Supporting information**

748 Figure S1

749 Title: Sampling location of each survey

750 Legends: Sampling location of flowering phenology survey (A) and sampling location of samples  
751 used for seed set (B) and germination test (C). The left panel is spring survey and the right panel is  
752 fall survey. Symbols mean a year in which a survey was conducted.

753

754 Figure S2

755 Title: CAPS markers in nuclear DNA

756 Legends: Complete length of ITS in cogongrass and a recognition site (A). Arrows and a  
757 triangle mean primers and a recognition site of *DdeI*, respectively. Grey bars mean  
758 not-deposited sequences to Genbank. Fragment length polymorphisms of ITS (B). ITS regions

759 were amplified using ITS CAPS primer set and PCR products were digested by *DdeI*. Complete  
760 length of EST104 in cogongrass and a recognition site (C). Arrows and a triangle mean primers  
761 and a recognition site of *RsaI*, respectively. Grey bars mean non-deposited sequences to  
762 Genbank. Fragment length polymorphisms of ITS (D). EST104 were amplified using EST104  
763 CAPS primer set and PCR products were digested by *RsaI*.

764

765 Figure S3

766 Title: Estimated haplotypes in C-, E-type and F<sub>1</sub> and SNP sites in each region

767 Legends: The IDs correspond to haplotype IDs in each region (Table S4). Filled color means  
768 haplotypes found in C-, E-type and F<sub>1</sub>.

769

770 Figure S4

771 Title: Morphological traits of both ecotype and F<sub>1</sub>

772 Legends: Culm hairs (A), wax on leaf sheaves (B), hairs on leaf sheaves (C), ratio of  
773 aerenchyma diameter in a rhizome pith to rhizome diameter (D) and ratio of aerenchyma  
774 diameter to leaf midrib diameter (E).

775

776 Figure S5



777 Title: CpDNA type of flowering ramets in natural habitats

778 Legends: Filled and hatched areas mean flowering and non-flowering ramets, respectively.

779 Orange and blue colors mean cpDNA of C- and E-type, respectively.

780

781 Figure S6

782 Title: Germination percentage of C-type sown in December under an incubator condition and an

783 outside condition

784 Legends: Germination tests in an incubator were conducted under 30/20°C, light/dark condition

785 (surveyed seeds under incubator, n = 160; outside, n = 177). Germination percentage under the

786 incubator condition is significantly higher than that under the outside condition ( $P < 0.001$ ).

787

788 Table S1. Used accessions

789

790 Table S2 Primer sets

791

792 Table S3 Seed set of hand-pollinated panicles

793

794 Table S4. SNPs in haplotypes of each region

795

796 Table S5 Linkage disequilibrium  $r^2$  for four regions

797

798

799 The English in this document has been checked by at least two professional editors, both native

800 speakers of English. For a certificate, please see: <http://www.textcheck.com/certificate/LIBpy9>

801 and <http://www.textcheck.com/certificate/ZPflvS>

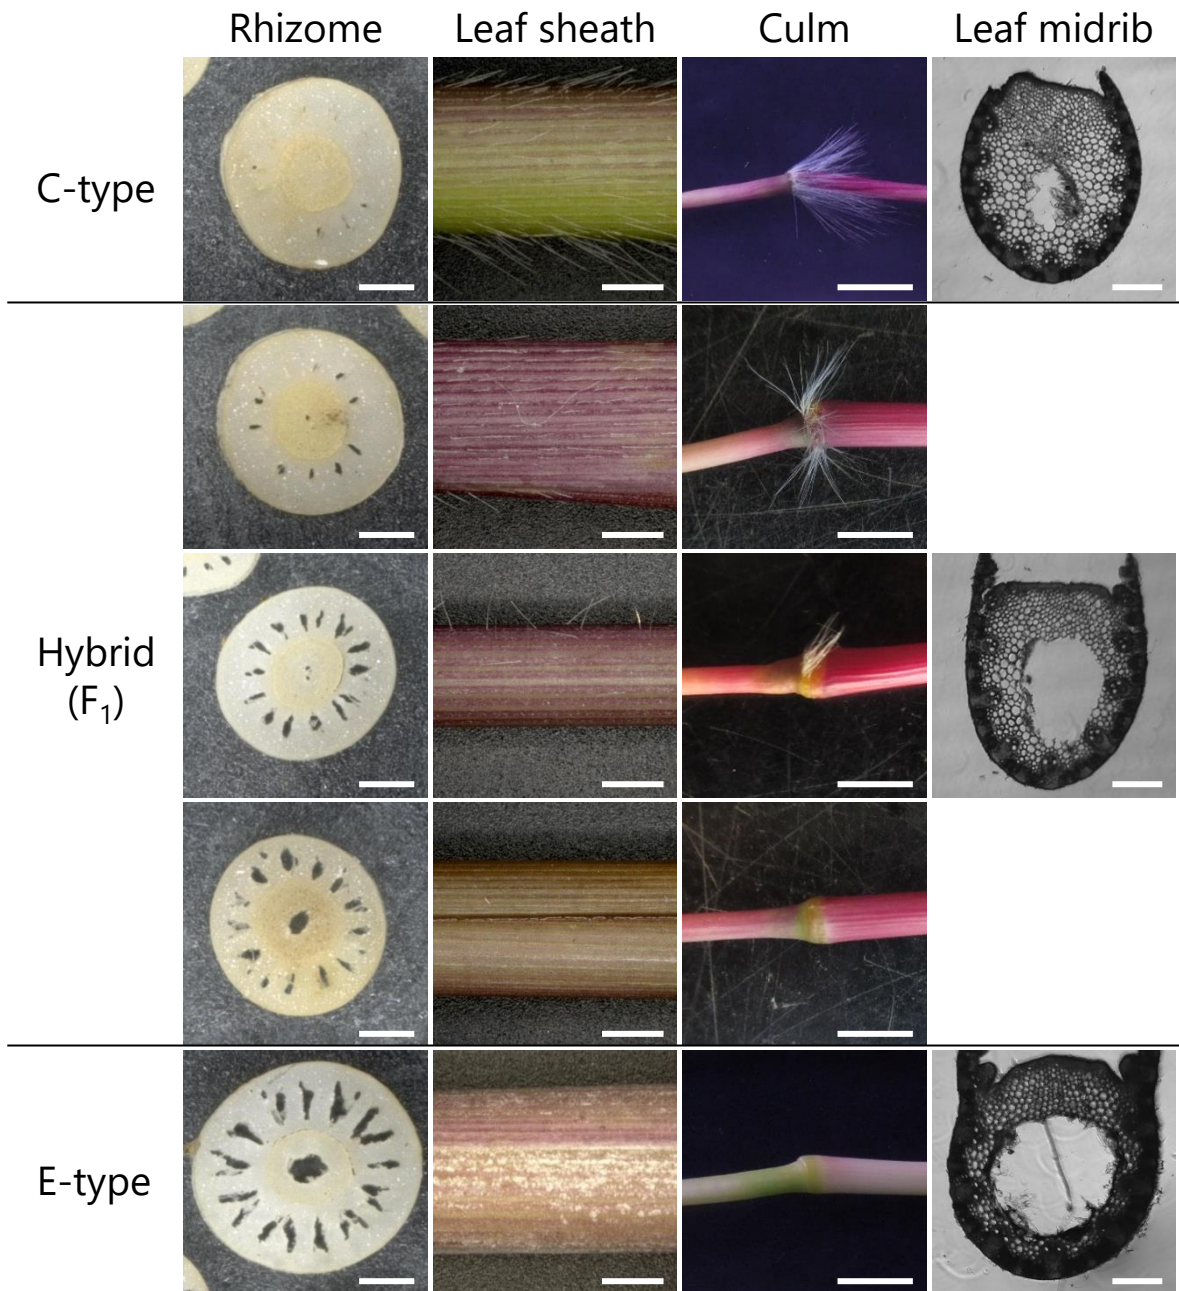

Figure 1

Title: Morphology of C-, E-type and hybrids

Legends: Bars in right bottom of photos are scale bars. Scale bars mean 1 cm, 1 cm, 0.5 cm and 250  $\mu$ m in rhizomes, leaf sheathes, culms and leaf midribs, respectively.

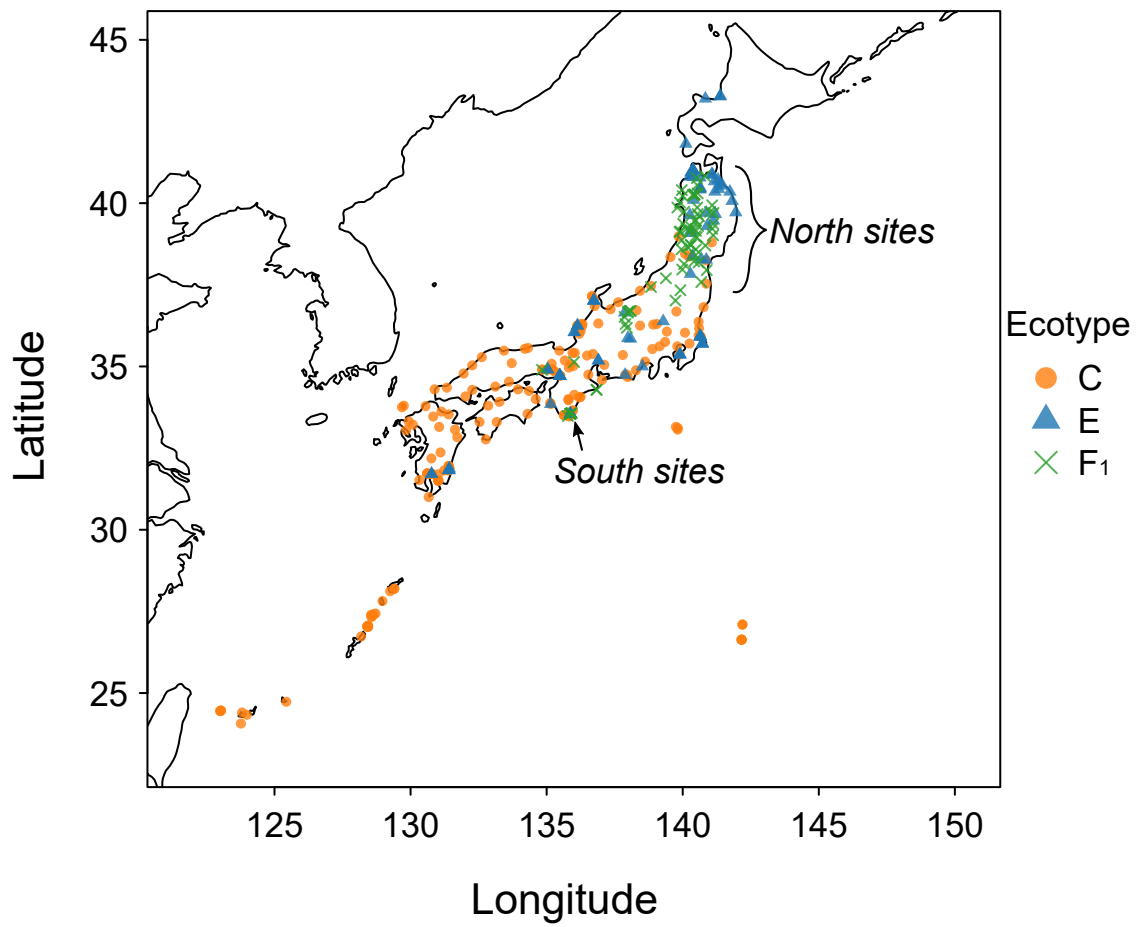

Figure 2

Title: Sampling location and distribution of each ecotype

Legends: Ecotypes were determined using CAPS marker in ITS region.

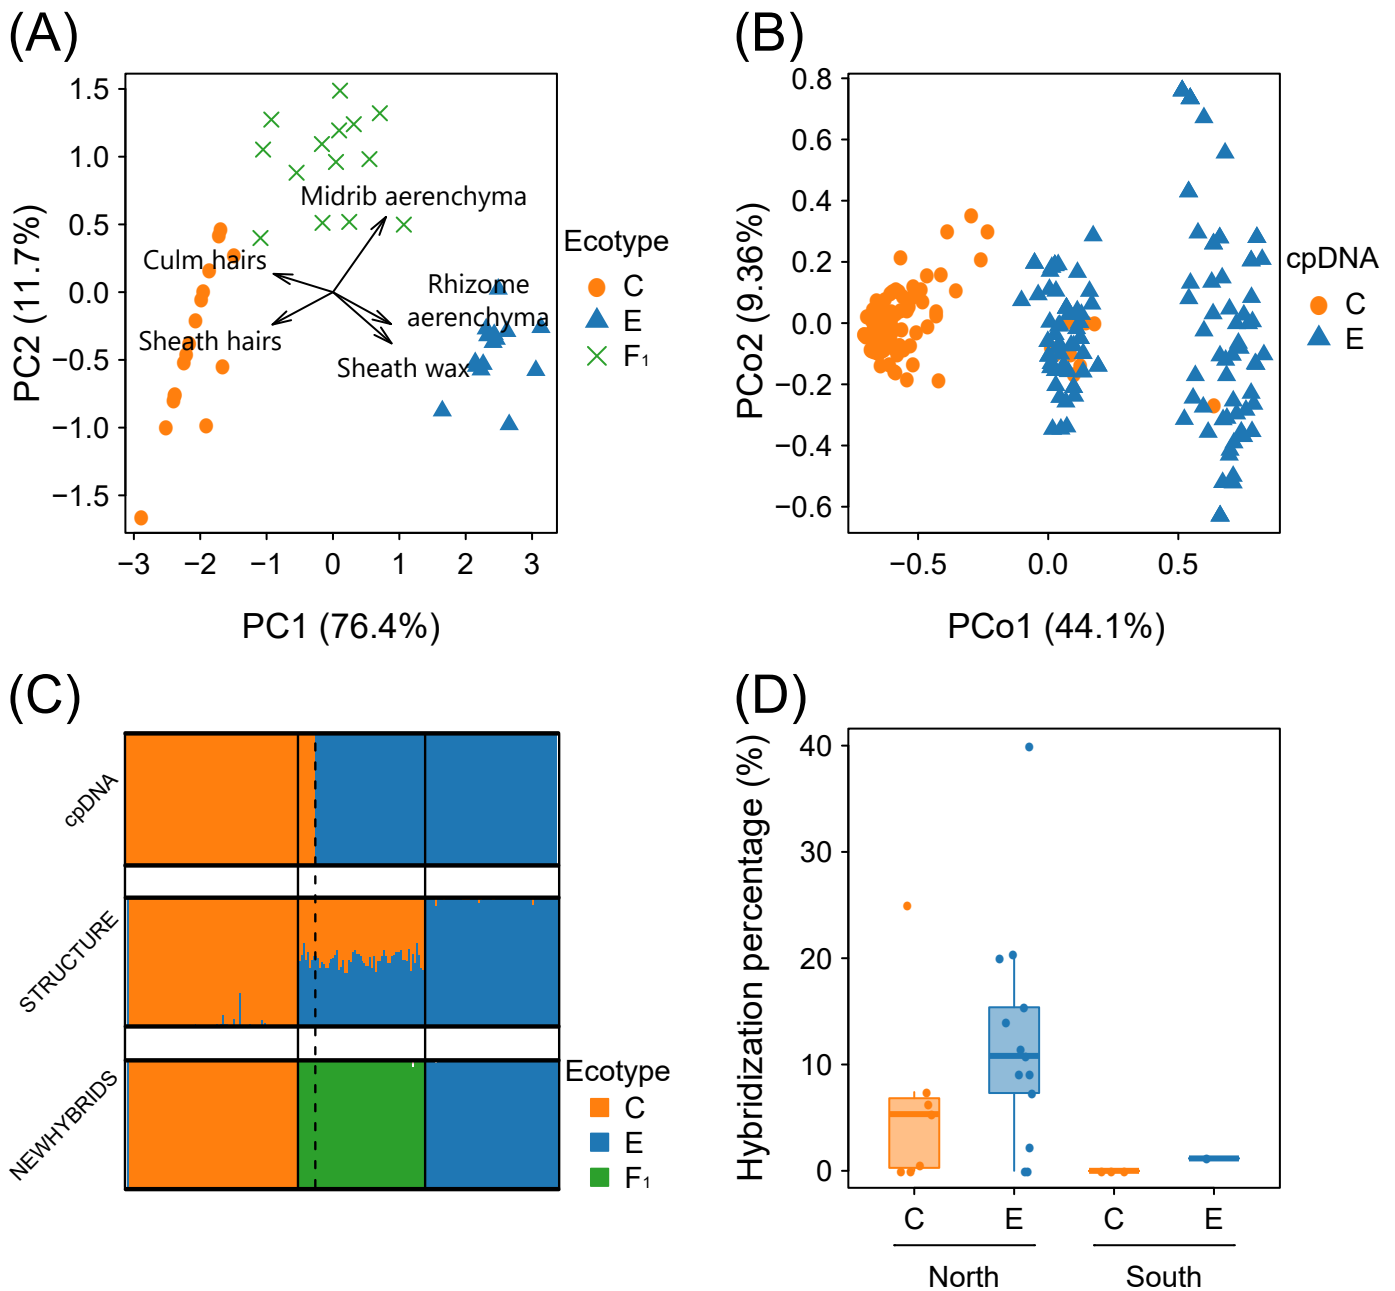

Figure 3

Title: Differentiation between C- and E-type and hybridisation percentage

Legends: Results of PCA for morphological traits (A). Results of PCoA for 12 markers in nuclear DNA (B). Results of analysis for cpDNA and STRUCTURE and NEWHYBRIDS for 12 markers in nuclear DNA (C). Top, middle and bottom figures are results of analysis for cpDNA, STRUCTURE and NEWHYBRIDS. Hybridisation percentage in natural habitats (D). X-axis means genotypes of panicles (C- or E-type) and study sites (north and south sites). Points means hybridisation percentage per each population (surveyed panicles in north sites: C-type, n = 377; E-type, n = 395; south sites: C-type, n = 222; E-type, n = 86). Hybridisation percentage of E-type is significantly higher than that of C-type (GLMM,  $P < 0.01$ ).

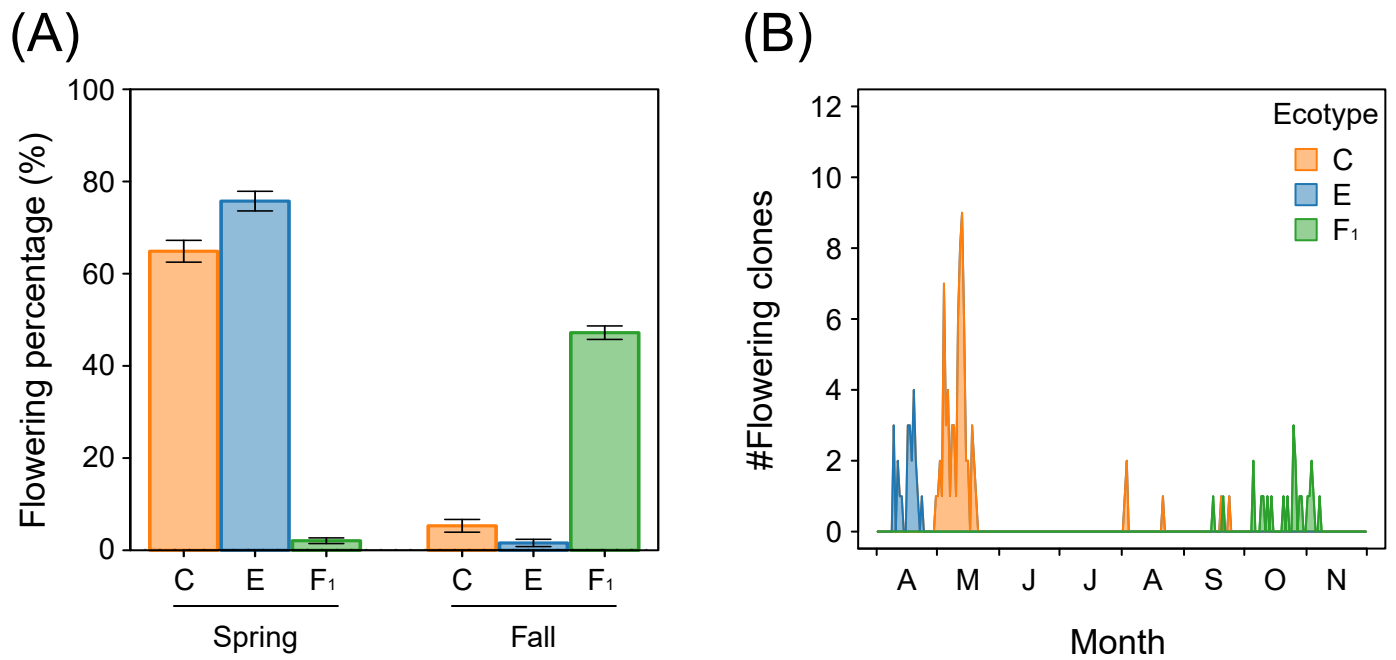

Figure 4

Title: Flowering phenology of C-, E-type and F1

Legends: Flowering phenology in natural populations (A). Flowering percentage means (flowering ramets/all ramets) x 100 (surveyed ramets in spring: C-type, n = 407; E-type, n = 404; F1, n = 532; fall: C-type, n = 264; E-type, n = 252; F1, n = 1161). Values and error bars represent means  $\pm$  s.e.m. Flowering percentage of F1 is significantly lower than that of C-type and E-type in spring while that of F1 is significantly higher than that of C-type and E-type in fall (Tukey HSD,  $P < 0.001$ ). Flowering phenology in Kyoto experimental farm (B).

## (A) Seed set survey

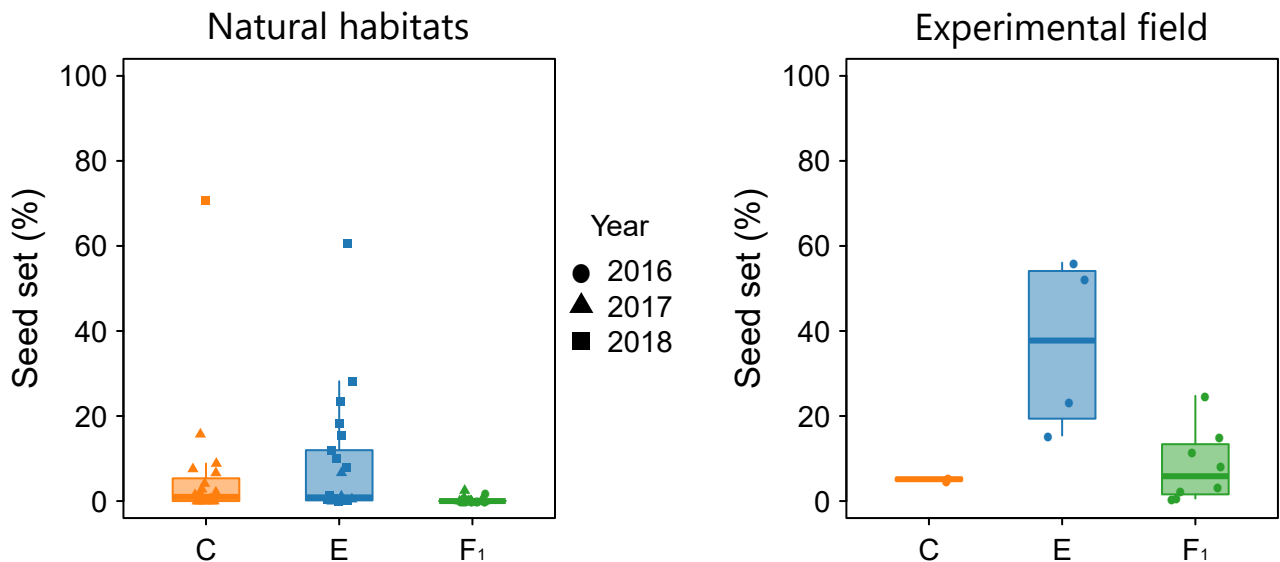

## (B) Germination test

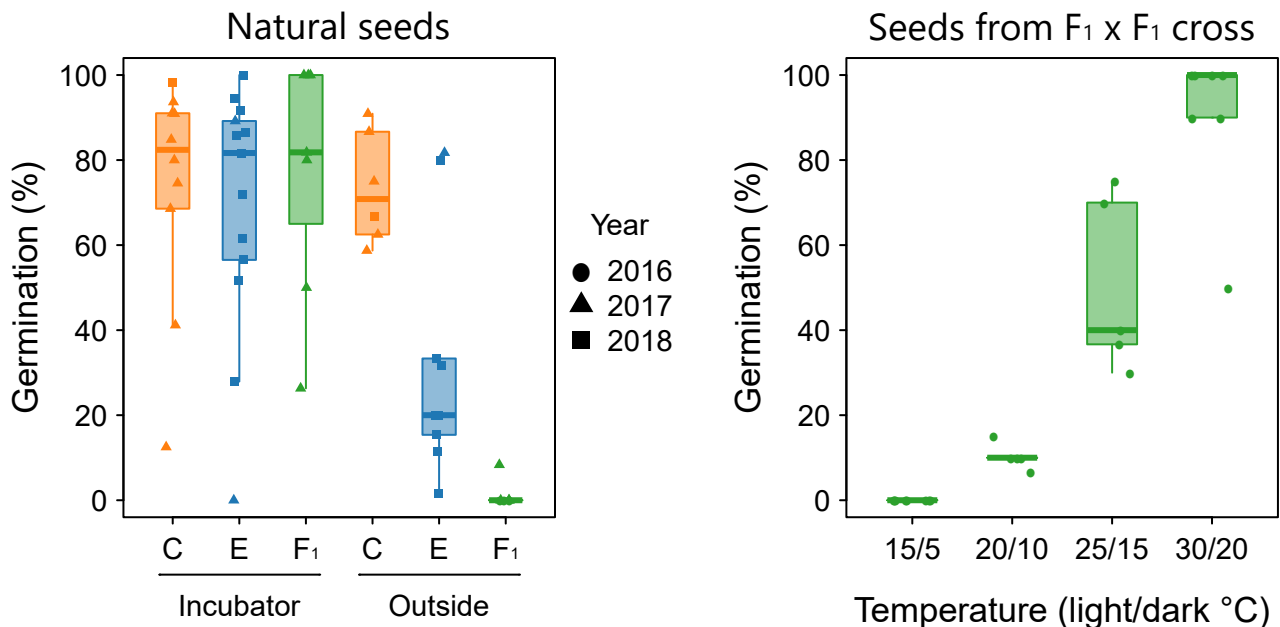

Figure 5

Title: Viability in sexual reproduction of C-, E-type and F1

Legends: Seed set analysis in natural habitats and an experimental field (A). Symbols mean a year in which an experiment was conducted in natural habitats (surveyed panicles: C-type,  $n = 122$ ; E-type,  $n = 183$ ; F1,  $n = 228$ ). Seed setting of F1 is significantly lower than that of C-type and E-type (Tukey HSD,  $P < 0.001$ ). Seed set percentage of hand-pollinated ecotypes and F1 was measured in an experimental field of Kyoto University (surveyed panicles: C-type,  $n = 7$ ; E-type,  $n = 9$ ; F1,  $n = 20$ ). Seed setting of F1 is not significantly differ from that of C-type (Tukey HSD,  $P = 0.996$ ) and significantly lower than that of E-type (Tukey HSD,  $P < 0.01$ ). Germination tests of seeds from natural habitats or artificial pollination (B). Left panel shows germination test of natural seeds under an incubator and an outside condition. Germination tests in incubator were conducted under 30/20°C, light/dark condition. C- and E-type seeds were sown in summer (May-August), while seeds set on F1 were sown in winter (December) (surveyed seeds under incubator: C-type,  $n = 784$ ; E-type,  $n = 525$ ; F1,  $n = 41$ ; outside: C-type,  $n = 271$ ; E-type,  $n = 443$ ; F1,  $n = 58$ ). Germination percentage of F1 is not significantly differ from that of E-type (Tukey HSD,  $P = 0.64$ ) and significantly lower than that of C-type (Tukey HSD,  $P < 0.05$ ) under the incubator condition. On the other hands, germination percentage of F1 is significantly lower than that of C-type (Tukey HSD,  $P < 0.001$ ) and E-type (Tukey HSD,  $P < 0.05$ ) under the outside condition. Right panel shows germination percentage of seeds produced from F1 x F1 cross under four temperature conditions (surveyed seeds: 5–15°C,  $n = 109$ ; 10–20°C,  $n = 90$ ; 15–25°C,  $n = 90$ ; 20–30°C,  $n = 103$ ). All points in three panels means seed set or germination percentage per each population or cross treatment.

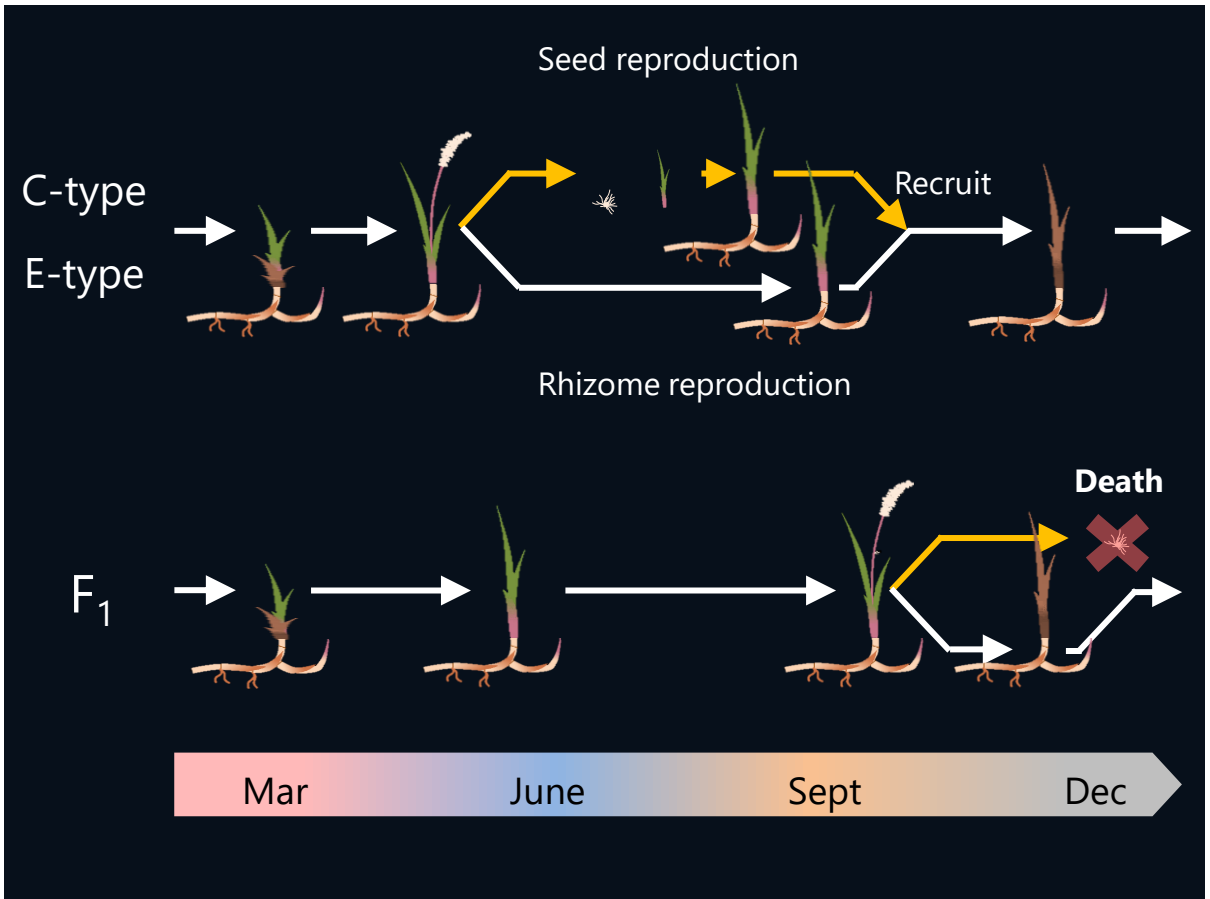

Figure 6

Title: Mechanism of  $F_1$  domination in hybrid population

Legends: C- and E-type flower in spring and disperse their seeds in summer. Seedlings are likely to be established, because seeds of C- and E-type are dispersed in a warm season. In contrast,  $F_1$  flowers in fall and disperse their seeds in winter. This suggests that seeds set on  $F_1$  are not able to germinate and are dead, because they are dispersed in a cold season.
